# Supplementary material
Source: PubMed Central journal article supplement (PMC7906439)
Supplement: NIHMS1671121-supplement-1.pdf [file NIHMS1671121-supplement-1.pdf]

## ***Supplement: A Simple, Interpretable Conversion from Pearson's Correlation to Cohen's $d$ for Meta-Analysis***

### 1. DERIVATION OF POINT ESTIMATE $d$

Suppose that  $Y = \beta_0 + \beta X + \epsilon$  with homoskedastic errors,  $X \perp \epsilon$ , and  $E[\epsilon] = 0$ . Let  $s_X^2$  and  $s_Y^2$  denote marginal sample variances, let  $s_{Y|X}^2$  denote the conditional sample variance of  $Y$ , and let  $r$  denote the sample correlation between  $Y$  and  $X$ . Define the Cohen's  $d$  of interest as the increase in  $Y$  associated with a  $\Delta$ -unit increase in  $X$ , taking  $c$  to be an arbitrary constant:

$$d = \frac{E[Y | X = c + \Delta] - E[Y | X = c]}{s_{Y|X}}$$

By homoskedasticity,  $s_{Y|X}^2 = E[s_{Y|X}^2]$ , yielding:

$$\begin{aligned} &= \frac{E[Y | X = c + \Delta] - E[Y | X = c]}{\sqrt{s_Y^2 - \text{Var}(E[Y|X])}} \\ &= \frac{E[Y | X = c + \Delta] - E[Y | X = c]}{\sqrt{s_Y^2 - \hat{\beta}^2 s_X^2}} \\ &= \frac{\hat{\beta} \Delta}{s_Y \sqrt{1 - r^2}} \\ &= \frac{r \Delta}{(s_X^2)^{1/2} \sqrt{1 - r^2}} \end{aligned}$$

### 2. DERIVATION OF STANDARD ERROR FOR $d$

Let  $\rho$  denote the population correlation, and let  $\sigma_X$  and  $\sigma_Y$  respectively denote the population standard deviations of  $X$  and  $Y$ . We first develop a supporting lemma establishing the asymptotic independence of the sample estimates  $r$  and  $s_X$ .

**Lemma 2.1.** *Suppose that  $r$  and  $s_X$  are estimated in the same sample of size  $N$ . Assume the distribution of  $(X_i, Y_i)$  satisfies the following regularity condition. Namely, letting*

$$\kappa_{ab} = E \left[ \left( \frac{X_i}{\sigma_X} \right)^a \left( \frac{Y_i}{\sigma_Y} \right)^b \right]$$

*denote the  $ab^{\text{th}}$  mixed standardized moment, we assume that  $\kappa_{31}$ ,  $\kappa_{22}$ , and  $\kappa_{40}$  are all finite (which we will show to hold for the bivariate normal distribution). Then  $\lim_{N \rightarrow \infty} \text{Cov}(r, s_X) = 0$ .*

*Proof.* Let  $(V_1, \dots, V_N)$  be an independently and identically distributed sample from a bivariate distribution  $V_i = [X_i, Y_i]'$  fulfilling the above regularity condition, and let

$$\Sigma = \text{Cov}(V_i) = \begin{bmatrix} \sigma_X^2 & \rho\sigma_X\sigma_Y \\ \rho\sigma_X\sigma_Y & \sigma_Y^2 \end{bmatrix}$$

Without loss of generality, assume  $E[V_i] = \mathbf{0}$ . The sample covariance

$$S_N = \frac{1}{N-1} \sum_{i=1}^N (V_i - \bar{V}_N)(V_i - \bar{V}_N)' = \frac{1}{N-1} \sum_{i=1}^N V_i V_i' - \frac{N}{N-1} \bar{V}_N \bar{V}_N'$$

is asymptotically unbiased and consistent for  $\Sigma$ , and in fact

$$\sqrt{N}(S_N - \Sigma) \rightarrow_D N(\mathbf{0}, \Lambda)$$

for some asymptotic covariance matrix,  $\Lambda$ . We now focus on determining this matrix. First, for a symmetric matrix  $\mathbf{A} = \begin{bmatrix} a & b \\ b & c \end{bmatrix}$ , let  $\tilde{A} = [a, b, c]'$  denote the “vectorization” of its upper triangle. Now consider a single element of the average that enters into the first term (i.e., the scatter matrix) of  $S_N$ :

$$\tilde{Z}_i = \widetilde{V_i V_i'} = \begin{bmatrix} X_i^2 \\ X_i Y_i \\ Y_i^2 \end{bmatrix}$$

The covariance matrix of these individual squared observations and their cross-product can be expressed in terms of the mixed standardized moments,  $\kappa_{ab}$ , as:

$$\Lambda = \text{Cov}(\tilde{Z}_i) = E[\tilde{Z}_i \tilde{Z}_i'] - E[\tilde{Z}_i] E[\tilde{Z}_i'] = \mathbf{K} - \tilde{\Sigma} \tilde{\Sigma}' \tag{2.1}$$

where

$$\mathbf{K} = \begin{bmatrix} \kappa_{40}\sigma_X^4 & \kappa_{31}\sigma_X^3\sigma_Y & \kappa_{22}\sigma_X^2\sigma_Y^2 \\ \kappa_{31}\sigma_X^3\sigma_Y & \kappa_{12}\sigma_X\sigma_Y^2 & \kappa_{13}\sigma_X\sigma_Y^3 \\ \kappa_{22}\sigma_X^2\sigma_Y^2 & \kappa_{13}\sigma_X\sigma_Y^3 & \kappa_{04}\sigma_Y^4 \end{bmatrix}$$

We now turn to estimating  $\text{Cov}(r, s_X)$  using Equation (2.1) and the delta method. Define the transformation  $g(x, y, z) = \left(x, \frac{y}{\sqrt{x}\sqrt{z}}\right)$  on  $\tilde{S}_N$ . This provides the bivariate distribution of  $(s_x, r)$ . By the delta method and the asymptotic normality of  $S_N$ :

$$\sqrt{N} \left( g(\tilde{S}_N) - (\rho, \sigma_X^2)' \right) \rightarrow_D N \left( \mathbf{0}, \mathbf{J}(\tilde{\Sigma})' \tilde{\Lambda} \mathbf{J}(\tilde{\Sigma}) \right) \quad (2.2)$$

where  $\mathbf{J}(\tilde{\Sigma})$  is the Jacobian of  $g$  evaluated at  $(\sigma_X^2, \rho\sigma_X\sigma_Y, \sigma_Y^2)$ , which is equal to:

$$\mathbf{J}(\tilde{\Sigma}) = \begin{bmatrix} 1 & -\frac{\rho}{2\sigma_X^2} \\ 0 & \frac{1}{\sigma_X\sigma_Y} \\ 0 & -\frac{\rho}{2\sigma_Y^2} \end{bmatrix}$$

From Equation (2.2), we thus have:

$$\tilde{\Lambda} \approx \mathbf{J}(\tilde{\Sigma})' [\mathbf{K} - \tilde{\Sigma}\tilde{\Sigma}'] \mathbf{J}(\tilde{\Sigma})$$

In terms of the mixed standardized moments of the bivariate distribution of  $(X_i, Y_i)$ , the entry of interest simplifies to:

$$N \times \text{Cov}(r, s_X) \approx \tilde{\Lambda}_{22} \approx \sigma_X^2 \left( \kappa_{31} - \frac{\rho(\kappa_{22} + \kappa_{40})}{2} \right)$$

Thus,  $\lim_{N \rightarrow \infty} \text{Cov}(r, s_X) = 0$  for any bivariate distribution satisfying the regularity condition. For example, for the bivariate normal distribution, applying Isserlis' Theorem regarding mixed standardized moments<sup>1</sup> yields  $k_{31} = 3\rho$ ,  $k_{22} = 1 + 2\rho^2$ , and  $k_{40} = 3$ , so the regularity condition holds and  $\lim_{N \rightarrow \infty} \text{Cov}(r, s_X) = 0$ .  $\square$

We now derive an approximate standard error of  $d$  using the delta method. Let  $z_f = \text{arctanh}(\rho)$  denote the Fisher-transformed population correlation and  $\hat{z}_f$  its sample estimate, which is asymptotically normal with variance  $\frac{1}{N-3}$ . Suppose  $s_X^2$  is estimated in a sample of size  $N_s$ , such that  $N_s = N$  if  $s_X^2$  is estimated in the same sample used to estimate  $r$ . Assuming that

$X$  is approximately normal, then asymptotically in  $N_s$ ,  $s_X^2$  is approximately normal with variance  $\frac{2(s_X^2)^2}{N_s-1}$ . Let  $\delta$  denote the population standardized mean difference and correlation. Define  $g$  as the function mapping  $z_f$  and  $\sigma_X^2$  to  $\delta$ :

$$g(x_1, x_2) = \frac{\Delta \tanh(x_1)}{(x_2)^{1/2} \sqrt{1 - \tanh^2(x_1)}}$$

Thus,  $g(z_f, \sigma_X^2) = \delta$ . The gradient evaluated at the population parameters is:

$$\nabla|_{(z_f, \sigma_X^2)} = \begin{bmatrix} \frac{\partial g}{\partial z_f} \\ \frac{\partial g}{\partial \sigma_X^2} \end{bmatrix} = \begin{bmatrix} \frac{\Delta}{\sigma_X \sqrt{\operatorname{sech}^2(z_f)}} \\ -\frac{1}{2}(\sigma_X^2)^{-3/2} \frac{\rho \Delta}{\sqrt{1-\rho^2}} \end{bmatrix} = \begin{bmatrix} \frac{\Delta}{\sigma_X \sqrt{1-\rho^2}} \\ -\frac{1}{2}(\sigma_X^2)^{-1} \delta \end{bmatrix} = \begin{bmatrix} \delta/\rho \\ -\frac{1}{2}(\sigma_X^2)^{-1} \delta \end{bmatrix}$$

Note that Lemma (2.1) regarding the asymptotic independence of  $z_f$  and  $s_x$  also implies that  $r$  and  $s_x$  are asymptotically independent because  $r$  is a function only of  $z_f$ . Thus, applying the delta method yields:

$$\begin{aligned} \widehat{\text{SE}}(d) &\approx \sqrt{\widehat{\text{v}}_1^2 \widehat{\text{SE}}^2(z_f) + \widehat{\text{v}}_2^2 \widehat{\text{SE}}^2(s_X^2)} \\ &= \sqrt{(d/r)^2 \frac{1}{N-3} + \frac{1}{4}(s_X^2)^{-2} d^2 \frac{2(s_X^2)^2}{N_s-1}} \\ &= |d| \sqrt{\frac{1}{r^2(N-3)} + \frac{1}{2(N_s-1)}} \end{aligned}$$

If  $r = 0$  exactly, the standard error estimate is undefined, so could be replaced by:

$$\lim_{r \rightarrow 0} \widehat{\text{SE}}(d) = \frac{|d|}{s_X} \sqrt{\frac{1}{N-3}}$$

## REFERENCES

- [1] Leon Isserlis. On a formula for the product-moment coefficient of any order of a normal frequency distribution in any number of variables. *Biometrika*, 12(1/2):134–139, 1918.
